# Supplementary material for: CoSTA: unsupervised convolutional neural network learning for spatial transcriptomics analysis
Source: PubMed Central journal article supplement (PMC8351440; doi:10.1186/s12859-021-04314-1), 2021-08-09
Supplement: 12859_2021_4314_MOESM1_ESM.pdf [file 12859_2021_4314_MOESM1_ESM.pdf]

Fig. S1

Overlook of MNIST handwritten digit data

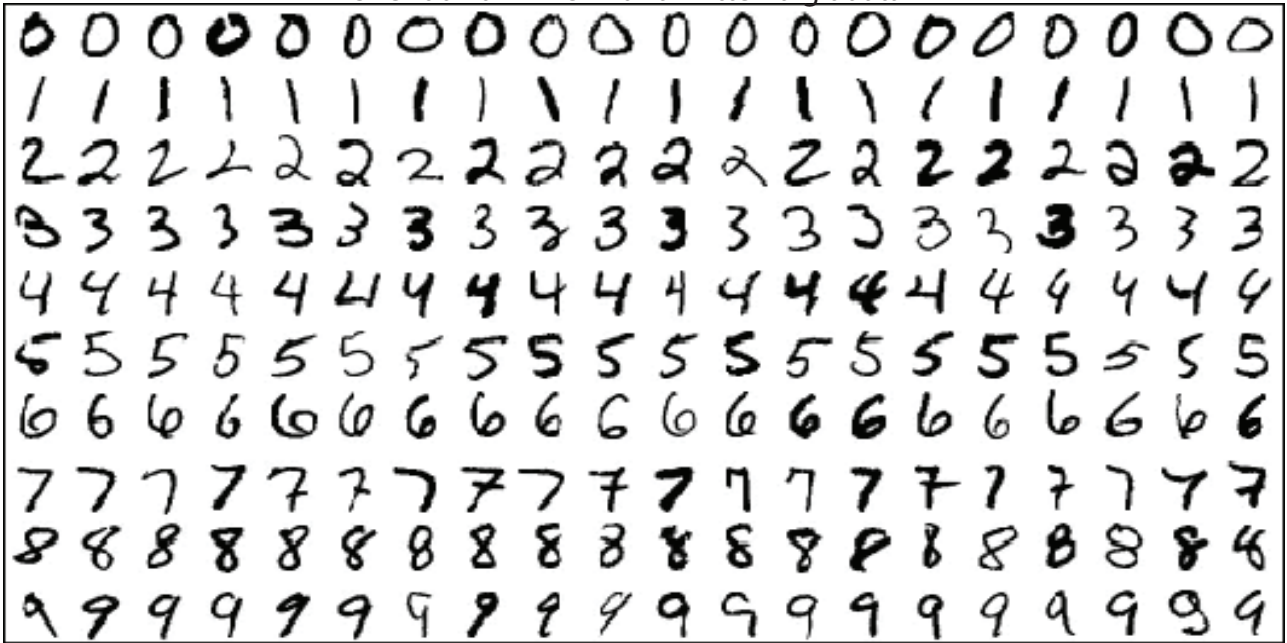

Percentage of correlated digits to 3

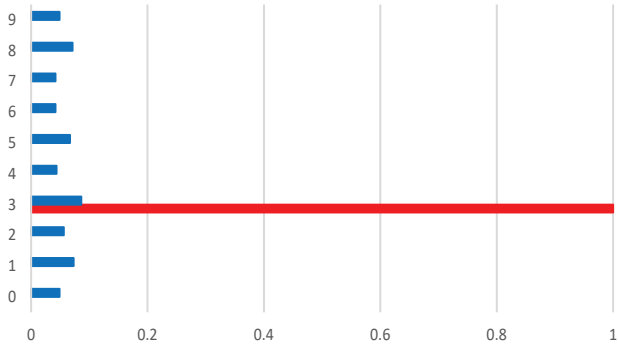

Number of correlated digits to 3

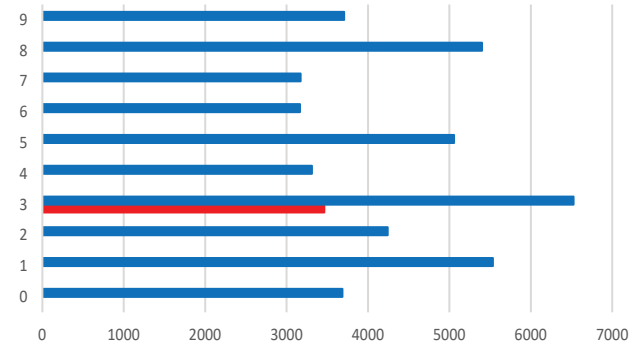

■ Overlap analysis ■ CoSTA
