# Supplementary material for: CoSTA: unsupervised convolutional neural network learning for spatial transcriptomics analysis
Source: PubMed Central journal article supplement (PMC8351440; doi:10.1186/s12859-021-04314-1), 2021-08-09

Fig. S2

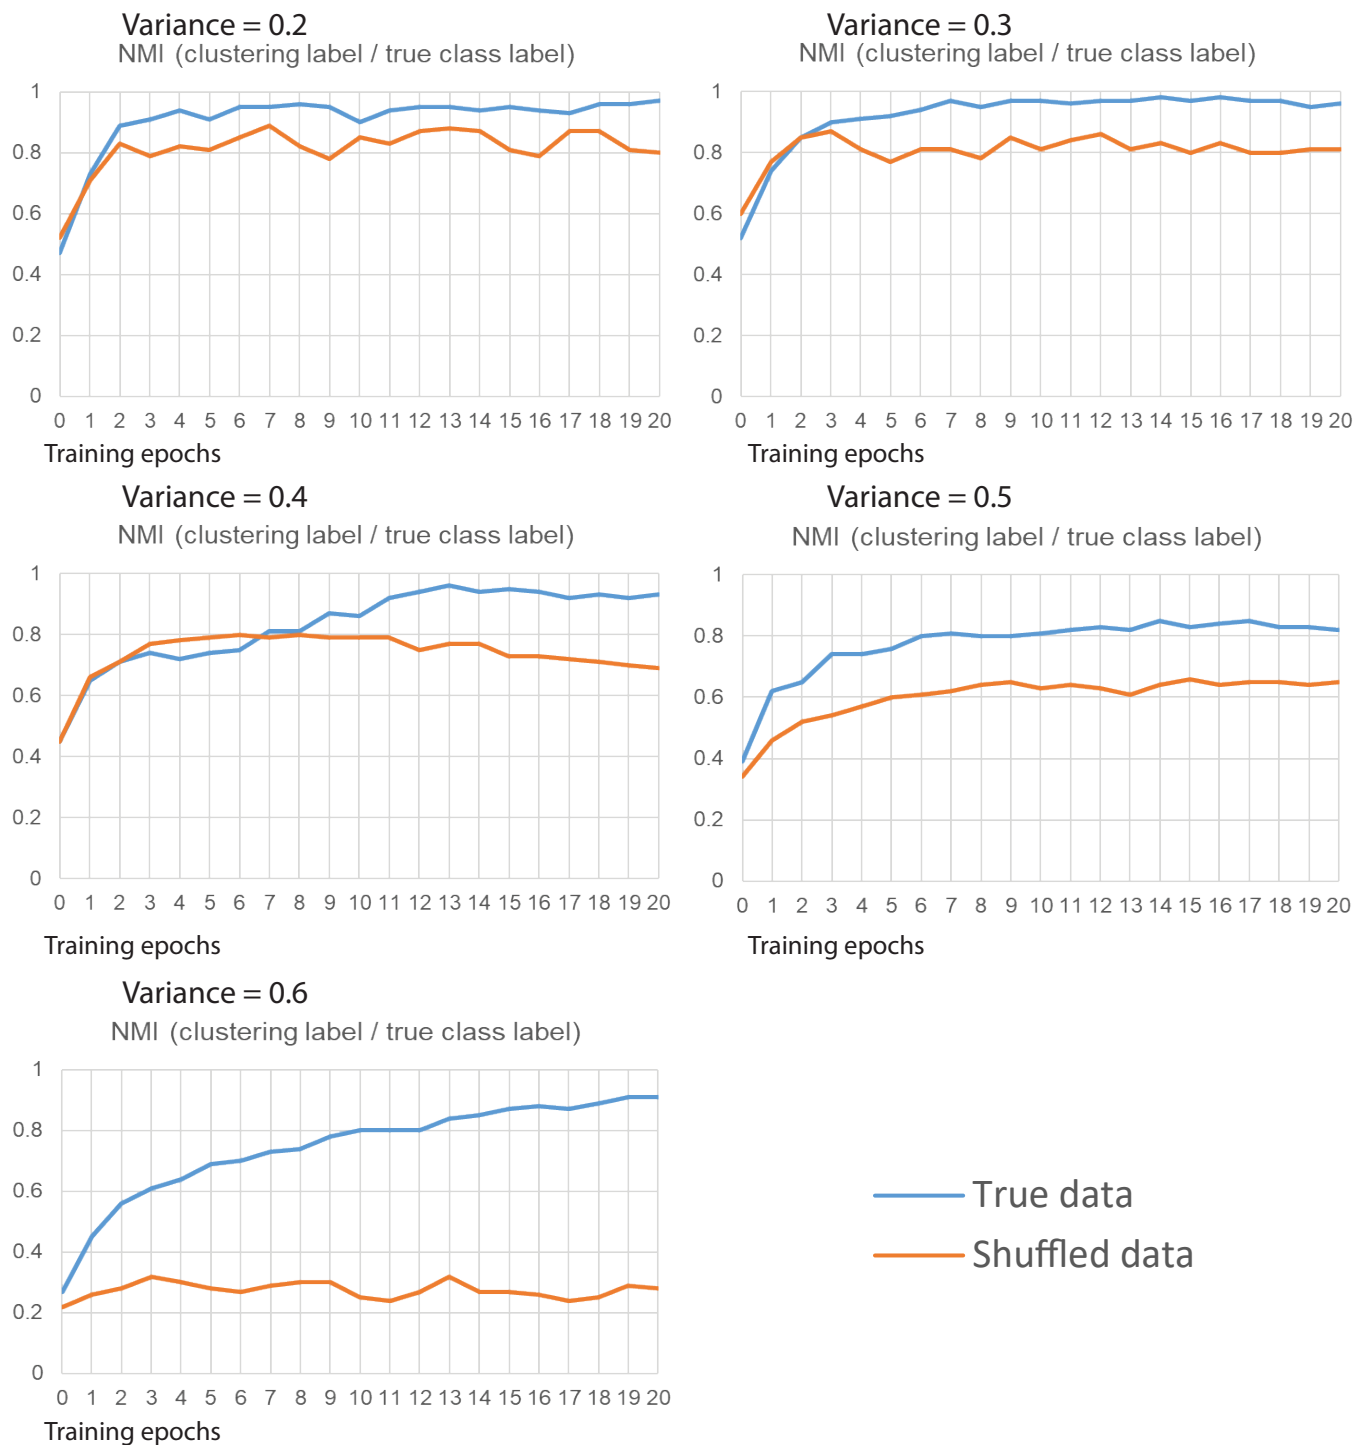

Shuffled patterns

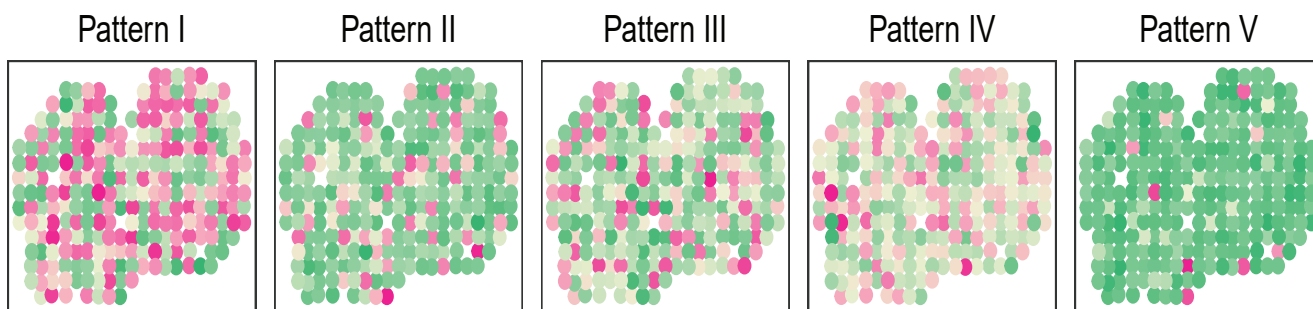

Supplement: 12859_2021_4314_MOESM2_ESM.pdf [file 12859_2021_4314_MOESM2_ESM.pdf]
