# Supplementary material for: CoSTA: unsupervised convolutional neural network learning for spatial transcriptomics analysis
Source: PubMed Central journal article supplement (PMC8351440; doi:10.1186/s12859-021-04314-1), 2021-08-09
Supplement: 12859_2021_4314_MOESM13_ESM.pdf [file 12859_2021_4314_MOESM13_ESM.pdf]

**Supplementary Table 1**

| <b>NMI</b>                    | <b>CoSTA</b>     |                      | <b>SpatialDE</b> |                      |
|-------------------------------|------------------|----------------------|------------------|----------------------|
| <b>noise level (variance)</b> | <b>True data</b> | <b>Shuffled data</b> | <b>True data</b> | <b>Shuffled data</b> |
| 0.2                           | 0.97             | 0.89                 | 1                | 0.86                 |
| 0.3                           | 0.98             | 0.87                 | 0.99             | 0.99                 |
| 0.4                           | 0.96             | 0.8                  | 0.99             | 0.99                 |
| 0.5                           | 0.85             | 0.66                 | 0.98             | 0.98                 |
| 0.6                           | 0.52 0.91        | 0.32                 | 0.97             | 0.97                 |
