# Supplementary material for: CoSTA: unsupervised convolutional neural network learning for spatial transcriptomics analysis
Source: PubMed Central journal article supplement (PMC8351440; doi:10.1186/s12859-021-04314-1), 2021-08-09
Supplement: 12859_2021_4314_MOESM14_ESM.pdf [file 12859_2021_4314_MOESM14_ESM.pdf]

**Supplementary Table 2**

| Gene          | Cluster |
|---------------|---------|
| Endothelial 1 | 0       |
| Ermn          | 0       |
| Gabra1        | 0       |
| Gjc3          | 0       |
| Igf1r         | 0       |
| Man1a         | 0       |
| Ndrgr1        | 0       |
| OD Mature 2   | 0       |
| Sema3c        | 0       |
| Sgk1          | 0       |
| Slco1a4       | 0       |
| Ttyh2         | 0       |
| Aldh1l1       | 1       |
| Amigo2        | 1       |
| Ar            | 1       |
| Arhgap36      | 1       |
| Astrocyte     | 1       |
| Cbln1         | 1       |
| Cbln2         | 1       |
| Cckar         | 1       |
| Cpne5         | 1       |
| Creb3l1       | 1       |
| Crhr2         | 1       |
| Cspg5         | 1       |
| Dgkk          | 1       |
| Excitatory    | 1       |
| Gabrg1        | 1       |
| Galr1         | 1       |
| Gira3         | 1       |
| Gpr165        | 1       |
| Htr2c         | 1       |
| Igf2r         | 1       |
| Inhibitory    | 1       |
| Irs4          | 1       |
| Isl1          | 1       |
| Kiss1r        | 1       |
| Onecut2       | 1       |
| Oprd1         | 1       |
| Oprk1         | 1       |
| Oprl1         | 1       |
| Pak3          | 1       |
| Pnoc          | 1       |
| Prlr          | 1       |
| Rnd3          | 1       |
| Scg2          | 1       |

|             | Cluster |
|-------------|---------|
| Slc17a6     | 1       |
| Sox4        | 1       |
| Sox6        | 1       |
| Sox8        | 1       |
| Syt4        | 1       |
| Tmem108     | 1       |
| Adora2a     | 2       |
| Bdnf        | 2       |
| Brs3        | 2       |
| Ccnd2       | 2       |
| Chat        | 2       |
| Endothelial | 2       |
| Gbx2        | 2       |
| Gem         | 2       |
| Grpr        | 2       |
| Krt90       | 2       |
| Lpar1       | 2       |
| Microglia   | 2       |
| Nts         | 2       |
| OD Mature   | 2       |
| Rgs5        | 2       |
| Rxfp1       | 2       |
| Selplg      | 2       |
| Cdkn1a      | 3       |
| Centpe      | 3       |
| Cplx3       | 3       |
| Cyp19a1     | 3       |
| Fezf1       | 3       |
| Fn1         | 3       |
| Klf4        | 3       |
| Mbp         | 3       |
| Ndnf        | 3       |
| Necab1      | 3       |
| Ntng1       | 3       |
| Nup62cl     | 3       |
| OD Mature   | 3       |
| Opalin      | 3       |
| Plin3       | 3       |
| Ramp3       | 3       |
| Slc17a8     | 3       |
| Sp9         | 3       |
| Syt14       | 3       |
| Tacr1       | 3       |
| Calcr       | 4       |
| Cxcl14      | 4       |
| Esr1        | 4       |

|             | Cluster |
|-------------|---------|
| Gad1        | 4       |
| Gal         | 4       |
| Gda         | 4       |
| Npy2r       | 4       |
| Penk        | 4       |
| Rgs2        | 4       |
| Serpinb1b   | 4       |
| Th          | 4       |
| Trhr        | 4       |
| Coch        | 5       |
| OD Immat    | 5       |
| Pcdh11x     | 5       |
| Pdgfra      | 5       |
| Traf4       | 5       |
| Crhbp       | 6       |
| Cyr61       | 6       |
| Ebf3        | 6       |
| Endothelial | 6       |
| Fst         | 6       |
| Gnrh1       | 6       |
| Lmod1       | 6       |
| Mki67       | 6       |
| Myh11       | 6       |
| OD Immat    | 6       |
| OD Mature   | 6       |
| Oxt         | 6       |
| Pericytes   | 6       |
| Sst         | 6       |
| Syt2        | 6       |
| Tac2        | 6       |
| Ucn3        | 6       |
| Adcyap1     | 7       |
| Aqp4        | 7       |
| Avpr1a      | 7       |
| Cckbr       | 7       |
| Cd24a       | 7       |
| Ependyma    | 7       |
| Etv1        | 7       |
| Fos         | 7       |
| Mlc1        | 7       |
| Nnat        | 7       |
| Nos1        | 7       |
| Npy1r       | 7       |
| Omp         | 7       |
| Pou3f2      | 7       |
| Sema4d      | 7       |

|         | Cluster |
|---------|---------|
| Slc15a3 | 7       |
| Slc18a2 | 7       |
| Sln     | 7       |
| Tac1    | 7       |
| Tiparp  | 7       |
| Avpr2   | 8       |
| Egr2    | 8       |
| Galr2   | 8       |
| Pgr     | 8       |
| Synpr   | 8       |
| Vgf     | 8       |
